# Supplementary material for: Interactions of the Fungal Community in the Complex Patho-System of Esca, a Grapevine Trunk Disease
Source: MDPI journal article supplement (doi:10.3390/ijms232314726), 2022-11-25
Supplement: s1 [file s1]

**Table S1.** Alfa-diversity estimation of the fungal community resulting from the cultured analysis of wood samples. Factor symptoms category.

| Symptoms         | S             | H'            | J' |
|------------------|---------------|---------------|----|
| As-BH            | 1,83±0,27     | 0,45±0,14     | -  |
| As-WR            | 1,55±0,21     | 0,33±0,12     | -  |
| Sy-BH            | 1,55±0,21     | 0,34±0,12     | -  |
| Sy-WR            | 1,50±0,20     | 0,31±0,12     | -  |
| ANOVA (p-values) | 0,48 (0,6946) | 0,24 (0,8667) |    |

S: Richness; H': Shannon's index and J': Pielou evenness index. Mean ± standard error, n=12 (n=11 for Sy-BH and As-WR). Significance of treatment effect is shown by F-values and p-values.

**Table S2.** Alfa-diversity estimation of the fungal community resulting from the cultured analysis of wood samples. Factor sample point.

| Sample Point     | S             | H'            | J' |
|------------------|---------------|---------------|----|
| A                | 1,75±0,25     | 0,44±0,14     | -  |
| B                | 1,42±0,15     | 0,26±0,10     | -  |
| C                | 1,70±0,26     | 0,41±0,15     | -  |
| D                | 1,58±0,23     | 0,33±0,12     | -  |
| ANOVA (p-values) | 0,45 (0,7203) | 0,42 (0,7383) |    |

S: Richness; H': Shannon's index and J': Pielou evenness index. Mean ± standard error, n=12 (n=10 for C). Significance of treatment effect is shown by F-values and p-values.

**Table S3.** Alfa-diversity estimation of the fungal community resulting from the non-cultured analysis of wood samples. Factor sample point.

| Sample Point     | S             | H'            | J'            |
|------------------|---------------|---------------|---------------|
| A                | 277,42±73,69  | 2,75±0,43     | 0,50±0,06     |
| B                | 255,92±39,84  | 2,89±0,29     | 0,53±0,04     |
| C                | 227,58±38,68  | 2,28±0,21     | 0,43±0,04     |
| D                | 197,92±30,28  | 2,30±0,33     | 0,44±0,05     |
| ANOVA (p-values) | 0,51 (0,6802) | 0,92 (0,4391) | 0,94 (0,4299) |

S: Richness; H': Shannon's index and J': Pielou evenness index. Mean ± standard error, n=12. Significance of treatment effect is shown by F-values and p-values.

**Table S4.** Indicator species analysis (ISA) for Sy-BH category at family taxa level.

| Significance      | ***    | **                         | *                         |
|-------------------|--------|----------------------------|---------------------------|
| Agaricaceae       | 0.0004 | Amanitaceae 0.0019         | Bartaliniaceae 0.0245     |
| Arachnomycetaceae | 0.0006 | Ascobolaceae 0.0049        | Chaetosphaeriaceae 0.0140 |
| Bionectriaceae    | 0.0006 | Bankeraceae 0.0072         | Coniochaetaceae 0.0370    |
| Boletaceae        | 0.0003 | Chaetomiaceae 0.0032       | Dermateaceae 0.0342       |
| Clavicipitaceae   | 0.0003 | Clavulinaceae 0.0022       | Didymosphaeriaceae 0.0163 |
| Cortinariaceae    | 0.0005 | Cordycipitaceae 0.0096     | Hydnaceae 0.0453          |
| Gloniaceae        | 0.0005 | Discinaceae 0.0067         | Hygrophoraceae 0.0331     |
| Lasiosphaeriaceae | 0.0001 | Gymnoascaceae 0.0054       | Hypocreaceae 0.0316       |
| Lipomycetaceae    | 0.0005 | Helotiaceae 0.0034         | Melanogastraceae 0.0269   |
| Myxotrichaceae    | 0.0003 | Helvellaceae 0.0076        | Melanommataceae 0.0201    |
| Pyronemataceae    | 0.0010 | Herpotrichiellaceae 0.0065 | Mucoraceae 0.0261         |
| Russulaceae       | 0.0004 | Hyaloscyphaceae 0.0013     | Pannariaceae 0.0474       |
| Sporormiaceae     | 0.0008 | Hymenogastraceae 0.0017    | Piskurozymaceae 0.0156    |
| Stachybotryaceae  | 0.0003 | Inocybaceae 0.0051         | Schizoporaceae 0.0480     |
| Trichocomaceae    | 0.0007 | Lycoperdaceae 0.0049       | Thelephoraceae 0.0295     |
| Tricholomataceae  | 0.0004 | Nectriaceae 0.0031         | Torulaceae 0.0346         |
| Tubeufiaceae      | 0.0002 | Omphalotaceae 0.0037       | Trichosporonaceae 0.0359  |
| Umbelopsidaceae   | 0.0002 | Onygenaceae 0.0011         |                           |
|                   |        | Pseudeurotiaceae 0.0018    |                           |
|                   |        | Schizoparmaceae 0.0082     |                           |
|                   |        | Sebacinaceae 0.0027        |                           |
|                   |        | Trichomeriaceae 0.0020     |                           |
|                   |        | Trimorphomycetaceae 0.0057 |                           |

Significance: \*\*\* p-value &lt; 0.001; \*\* p-value &lt; 0.01; \* p-value &lt; 0.05

**Table S5.** Trophic mode and guild classification of the 622 most representative ASVs: 297 saprotrophs (S); 229 pathotrophs (P): classified as plant-pathogen (PP), Grapevine Trunk Diseases associated fungi (GTDs) and those causing white rot (WR); 66 symbiotrophs (Sy) and 30 potential biocontrol for GTDs (BCA).

| TM | Phylum     | Order             | Family               | Genus                    | N° ASVs | N° spp.  | PP | GTDs | WR | Ecto | Ericoid | References |
|----|------------|-------------------|----------------------|--------------------------|---------|----------|----|------|----|------|---------|------------|
| S  | Ascomycota | Capnodiales       | Cladosporiaceae      | <i>Cladosporium</i>      | 8       | 3 + sp.  | -  | -    | -  | -    | -       | [12,16]    |
| S  | Ascomycota | Chaetosphaeriales | Chaetosphaeriaceae   | <i>Chloridium</i>        | 1       | 1        | -  | -    | -  | -    | -       | [16]       |
| S  | Ascomycota | Chaetothyriales   | Herpotrichiellaceae  | <i>Cladophialophora</i>  | 5       | 1 + sp.  | -  | -    | -  | -    | -       | [17]       |
| S  | Ascomycota | Chaetothyriales   | Herpotrichiellaceae  | <i>Exophiala</i>         | 7       | 5 + sp.  | -  | -    | -  | -    | -       | [16,17]    |
| S  | Ascomycota | Chaetothyriales   | Incertae_Sedis       | <i>Phaeoannellomyces</i> | 2       | 1        | -  | -    | -  | -    | -       | [16]       |
| S  | Ascomycota | Dothideales       | Dothioraceae         | <i>Hormonema</i>         | 1       | 1        | -  | -    | -  | -    | -       | [16,17]    |
| S  | Ascomycota | Eurotiales        | Aspergillaceae       | <i>Aspergillus</i>       | 14      | 13 + sp. | -  | -    | -  | -    | -       | [12,16]    |
| S  | Ascomycota | Eurotiales        | Aspergillaceae       | <i>Neosartorya</i>       | 1       | sp.      | -  | -    | -  | -    | -       | [16,17]    |
| S  | Ascomycota | Eurotiales        | Aspergillaceae       | <i>Penicillago</i>       | 1       | 1        | -  | -    | -  | -    | -       | This study |
| S  | Ascomycota | Eurotiales        | Aspergillaceae       | <i>Penicillium</i>       | 34      | 25 + sp. | -  | -    | -  | -    | -       | [12,16,17] |
| S  | Ascomycota | Eurotiales        | Trichocomaceae       | <i>Sagenomella</i>       | 2       | 2        | -  | -    | -  | -    | -       | [16,17]    |
| S  | Ascomycota | Eurotiales        | Trichocomaceae       | <i>Talaromyces</i>       | 6       | 5 + sp.  | -  | -    | -  | -    | -       | [12,16,17] |
| S  | Ascomycota | Eurotiales        | Trichocomaceae       | <i>Thermomyces</i>       | 1       | 1        | -  | -    | -  | -    | -       | [16]       |
| S  | Ascomycota | Glomerellales     | Plectosphaerellaceae | <i>Acrostalagmus</i>     | 1       | 1        | -  | -    | -  | -    | -       | [12,16,17] |
| S  | Ascomycota | Glomerellales     | Plectosphaerellaceae | <i>Furcasterigmium</i>   | 1       | 1        | -  | -    | -  | -    | -       | [16]       |
| S  | Ascomycota | Helotiales        | Dermateaceae         | <i>Mollisia</i>          | 1       | 1        | -  | -    | -  | -    | -       | [12]       |
| S  | Ascomycota | Helotiales        | Helotiaceae          | <i>Articulospora</i>     | 1       | sp.      | -  | -    | -  | -    | -       | [16]       |
| S  | Ascomycota | Helotiales        | Helotiaceae          | <i>Bloxamia</i>          | 1       | sp.      | -  | -    | -  | -    | -       | [16,17]    |
| S  | Ascomycota | Helotiales        | Helotiaceae          | <i>Crocicreas</i>        | 1       | 1        | -  | -    | -  | -    | -       | [16,17]    |
| S  | Ascomycota | Helotiales        | Helotiaceae          | <i>Scytalidium</i>       | 1       | 1        | -  | -    | -  | -    | -       | [16]       |
| S  | Ascomycota | Helotiales        | Helotiaceae          | <i>Tetracladium</i>      | 3       | sp.      | -  | -    | -  | -    | -       | [16,17]    |
| S  | Ascomycota | Helotiales        | Helotiaceae          | <i>Tympanis</i>          | 1       | sp.      | -  | -    | -  | -    | -       | [17]       |
| S  | Ascomycota | Helotiales        | Hyaloscyphaceae      | <i>Arachnopeziza</i>     | 1       | sp.      | -  | -    | -  | -    | -       | [16,17]    |

|   |            |                |                      |                           |   |     |   |   |   |   |   |            |
|---|------------|----------------|----------------------|---------------------------|---|-----|---|---|---|---|---|------------|
| S | Ascomycota | Helotiales     | Hyaloscyphaceae      | <i>Hyaloscypha</i>        | 2 | 1   | - | - | - | - | - | [16,17]    |
| S | Ascomycota | Helotiales     | Incertae_Sedis       | <i>Chalara</i>            | 1 | sp. | - | - | - | - | - | [16,17]    |
| S | Ascomycota | Hypocreales    | Clavicipitaceae      | <i>Metarhizium</i>        | 1 | 1   | - | - | - | - | - | [12]       |
| S | Ascomycota | Hypocreales    | Hypocreaceae         | <i>Monocillium</i>        | 2 | 2   | - | - | - | - | - | [16,17]    |
| S | Ascomycota | Hypocreales    | Incertae_Sedis       | <i>Sesquicillium</i>      | 1 | 1   | - | - | - | - | - | [16,17]    |
| S | Ascomycota | Hypocreales    | Ophiocordycipitaceae | <i>Polycephalomycetes</i> | 1 | 1   | - | - | - | - | - | This study |
| S | Ascomycota | Hypocreales    | Stachybotryaceae     | <i>Albifimbria</i>        | 1 | 1   | - | - | - | - | - | [12]       |
| S | Ascomycota | Hypocreales    | Stachybotryaceae     | <i>Myrothecium</i>        | 1 | 1   | - | - | - | - | - | [12,16,17] |
| S | Ascomycota | Hypocreales    | Stachybotryaceae     | <i>Stachybotrys</i>       | 1 | 1   | - | - | - | - | - | [12,17]    |
| S | Ascomycota | Incertae_Sedis | Incertae_Sedis       | <i>Hawksworthiana</i>     | 1 | sp. | - | - | - | - | - | [16]       |
| S | Ascomycota | Microascales   | Microascaceae        | <i>Cephalotrichum</i>     | 1 | 1   | - | - | - | - | - | [16]       |
| S | Ascomycota | Myrmecridiales | Myrmecridiaceae      | <i>Myrmecridium</i>       | 1 | 1   | - | - | - | - | - | [16,17]    |
| S | Ascomycota | Onygenales     | Arachnomycetaceae    | <i>Arachnomycetes</i>     | 1 | 1   | - | - | - | - | - | [12,16,17] |
| S | Ascomycota | Onygenales     | Gymnoascaceae        | <i>Arachniotus</i>        | 1 | 1   | - | - | - | - | - | [16,17]    |
| S | Ascomycota | Onygenales     | Gymnoascaceae        | <i>Gymnascella</i>        | 2 | 1   | - | - | - | - | - | [12,16,17] |
| S | Ascomycota | Onygenales     | Gymnoascaceae        | <i>Leucothecium</i>       | 2 | 1   | - | - | - | - | - | [16,17]    |
| S | Ascomycota | Onygenales     | Incertae_Sedis       | <i>Chrysosporium</i>      | 7 | 4   | - | - | - | - | - | [12,16]    |
| S | Ascomycota | Onygenales     | Onygenaceae          | <i>Auxarthron</i>         | 1 | 1   | - | - | - | - | - | [16,17]    |
| S | Ascomycota | Onygenales     | Onygenaceae          | <i>Myriodontium</i>       | 1 | 1   | - | - | - | - | - | [16,17]    |
| S | Ascomycota | Pezizales      | Ascobolaceae         | <i>Ascobolus</i>          | 1 | sp. | - | - | - | - | - | [16,17]    |
| S | Ascomycota | Pezizales      | Discinaceae          | <i>Gyromitra</i>          | 1 | sp. | - | - | - | - | - | [16,17]    |
| S | Ascomycota | Pleosporales   | Amorosiaceae         | <i>Angustimassarina</i>   | 1 | 1   | - | - | - | - | - | [12,16]    |
| S | Ascomycota | Pleosporales   | Biatrisporaceae      | <i>Biatrispora</i>        | 1 | 1   | - | - | - | - | - | This study |
| S | Ascomycota | Pleosporales   | Coniothyriaceae      | <i>Coniothyrium</i>       | 1 | 1   | - | - | - | - | - | [17]       |
| S | Ascomycota | Pleosporales   | Cucurbitariaceae     | <i>Neocucurbitaria</i>    | 2 | 2   | - | - | - | - | - | [16]       |
| S | Ascomycota | Pleosporales   | Cucurbitariaceae     | <i>Pyrenochaeta</i>       | 1 | sp. | - | - | - | - | - | [16,17]    |

|   |            |                   |                       |                            |   |         |   |   |   |   |   |            |
|---|------------|-------------------|-----------------------|----------------------------|---|---------|---|---|---|---|---|------------|
| S | Ascomycota | Pleosporales      | Cucurbitariaceae      | <i>Pyrenochaetopsis</i>    | 6 | 2 + sp. | - | - | - | - | - | [17]       |
| S | Ascomycota | Pleosporales      | Didymellaceae         | <i>Phoma</i>               | 2 | sp.     | - | - | - | - | - | [12,17]    |
| S | Ascomycota | Pleosporales      | Didymosphaeriaceae    | <i>Didymosphaeria</i>      | 1 | 1       | - | - | - | - | - | [12,16,17] |
| S | Ascomycota | Pleosporales      | Didymosphaeriaceae    | <i>Paraphaeosphaeria</i>   | 3 | 2 + sp. | - | - | - | - | - | [16,17]    |
| S | Ascomycota | Pleosporales      | Didymosphaeriaceae    | <i>Pseudocamarosporium</i> | 1 | 1       | - | - | - | - | - | [12,16,17] |
| S | Ascomycota | Pleosporales      | Lentitheciaceae       | <i>Keissleriella</i>       | 1 | 1       | - | - | - | - | - | [16,17]    |
| S | Ascomycota | Pleosporales      | Lentitheciaceae       | <i>Poaceascoma</i>         | 1 | 1       | - | - | - | - | - | [16]       |
| S | Ascomycota | Pleosporales      | Lophiostomataceae     | <i>Lophiostoma</i>         | 1 | 1       | - | - | - | - | - | [12,16,17] |
| S | Ascomycota | Pleosporales      | Lophiotremataceae     | <i>Lophiotrema</i>         | 2 | 1 + sp. | - | - | - | - | - | [12,16,17] |
| S | Ascomycota | Pleosporales      | Massarinaceae         | <i>Massarina</i>           | 1 | 1       | - | - | - | - | - | [12,17]    |
| S | Ascomycota | Pleosporales      | Phaeosphaeriaceae     | <i>Hydeomyces</i>          | 4 | 1       | - | - | - | - | - | [16,17]    |
| S | Ascomycota | Pleosporales      | Phaeosphaeriaceae     | <i>Neosetophoma</i>        | 4 | 2 + sp. | - | - | - | - | - | [16,17]    |
| S | Ascomycota | Pleosporales      | Pyrenochaetopsidaceae | <i>Neopyrenochaeta</i>     | 1 | 1       | - | - | - | - | - | [16]       |
| S | Ascomycota | Pleosporales      | Sporormiaceae         | <i>Preussia</i>            | 1 | 1       | - | - | - | - | - | [12,16,17] |
| S | Ascomycota | Pleosporales      | Torulaceae            | <i>Torula</i>              | 1 | 1       | - | - | - | - | - | [16]       |
| S | Ascomycota | Saccharomycetales | Debaryomycetaceae     | <i>Debaryomyces</i>        | 1 | 1       | - | - | - | - | - | [16,17]    |
| S | Ascomycota | Saccharomycetales | Incertae_Sedis        | <i>Candida</i>             | 2 | 2       | - | - | - | - | - | [16,17]    |
| S | Ascomycota | Saccharomycetales | Incertae_Sedis        | <i>Starmerella</i>         | 1 | 1       | - | - | - | - | - | [16]       |
| S | Ascomycota | Saccharomycetales | Lipomycetaceae        | <i>Lipomyces</i>           | 2 | 2       | - | - | - | - | - | [16]       |
| S | Ascomycota | Saccharomycetales | Pichiaceae            | <i>Kregervanrija</i>       | 1 | 1       | - | - | - | - | - | [16]       |
| S | Ascomycota | Saccharomycetales | Trichomonascaceae     | <i>Trichomonascus</i>      | 1 | sp.     | - | - | - | - | - | [16]       |
| S | Ascomycota | Saccharomycetales | Unknown               | <i>Unknown</i>             | 1 | 1       | - | - | - | - | - | This study |
| S | Ascomycota | Sordariales       | Chaetomiaceae         | <i>Chaetomium</i>          | 1 | sp.     | - | - | - | - | - | [12,16]    |
| S | Ascomycota | Sordariales       | Chaetomiaceae         | <i>Humicola</i>            | 3 | 2 + sp. | - | - | - | - | - | [12,16]    |
| S | Ascomycota | Sordariales       | Chaetomiaceae         | <i>Myceliophthora</i>      | 1 | 1       | - | - | - | - | - | This study |
| S | Ascomycota | Thelebolales      | Pseudeurotiaceae      | <i>Geomyces</i>            | 2 | 1 + sp. | - | - | - | - | - | [12,16,17] |

|   |               |                     |                      |                           |   |         |   |   |   |   |   |            |
|---|---------------|---------------------|----------------------|---------------------------|---|---------|---|---|---|---|---|------------|
| S | Ascomycota    | Thelebolales        | Pseudeurotiaceae     | <i>Gymnostellatospora</i> | 2 | 1       | - | - | - | - | - | [16,17]    |
| S | Ascomycota    | Thelebolales        | Pseudeurotiaceae     | <i>Pseudeurotium</i>      | 6 | 3 + sp. | - | - | - | - | - | [16,17]    |
| S | Ascomycota    | Thelebolales        | Pseudeurotiaceae     | <i>Pseudogymnoascus</i>   | 5 | 2 + sp. | - | - | - | - | - | [12,16,17] |
| S | Ascomycota    | Tubeufiales         | Tubeufiaceae         | <i>Tिताеа</i>             | 1 | 1       | - | - | - | - | - | [16,17]    |
| S | Ascomycota    | Unknown             | Unknown              | Unknown                   | 1 | 1       | - | - | - | - | - | This study |
| S | Ascomycota    | Xylariales          | Xylariaceae          | <i>Zygosporium</i>        | 1 | 1       | - | - | - | - | - | [16]       |
| S | Basidiomycota | Agaricales          | Marasmiaceae         | <i>Marasmius</i>          | 1 | 1       | - | - | - | - | - | [12,16,17] |
| S | Basidiomycota | Agaricales          | Omphalotaceae        | <i>Rhodocollybia</i>      | 1 | 1       | - | - | - | - | - | [16,17]    |
| S | Basidiomycota | Agaricales          | Psathyrellaceae      | <i>Coprinellus</i>        | 2 | 1       | - | - | - | - | - | [12,16,17] |
| S | Basidiomycota | Agaricales          | Tricholomataceae     | <i>Clitocybe</i>          | 1 | 1       | - | - | - | - | - | [16]       |
| S | Basidiomycota | Cystofilobasidiales | Cystofilobasidiaceae | <i>Cystofilobasidium</i>  | 4 | 2       | - | - | - | - | - | [16,17]    |
| S | Basidiomycota | Cystofilobasidiales | Mrakiaceae           | <i>Tausonia</i>           | 1 | 1       | - | - | - | - | - | [16]       |
| S | Basidiomycota | Filobasidiales      | Filobasidiaceae      | <i>Filobasidium</i>       | 4 | 4       | - | - | - | - | - | [16,17]    |
| S | Basidiomycota | Filobasidiales      | Filobasidiaceae      | <i>Naganishia</i>         | 7 | 3       | - | - | - | - | - | [16]       |
| S | Basidiomycota | Filobasidiales      | Piskurozymaceae      | <i>Solicoccozyma</i>      | 6 | 3       | - | - | - | - | - | [16]       |
| S | Basidiomycota | Geminibasidiales    | Geminibasidiaceae    | <i>Geminibasidium</i>     | 1 | 1       | - | - | - | - | - | [16,17]    |
| S | Basidiomycota | Holtermanniales     | Incertae_Sedis       | <i>Holtermanniella</i>    | 1 | 1       | - | - | - | - | - | [16]       |
| S | Basidiomycota | Incertae_Sedis      | Buckleyzymaceae      | <i>Buckleyzyma</i>        | 1 | sp.     | - | - | - | - | - | [16,17]    |
| S | Basidiomycota | Incertae_Sedis      | Incertae_Sedis       | <i>Curvibasidium</i>      | 1 | 1       | - | - | - | - | - | [16]       |
| S | Basidiomycota | Sporidiobolales     | Sporidiobolaceae     | <i>Rhodotorula</i>        | 1 | 1       | - | - | - | - | - | [12,16,17] |
| S | Basidiomycota | Tremellales         | Bulleraceae          | <i>Pseudotremella</i>     | 1 | 1       | - | - | - | - | - | [16]       |
| S | Basidiomycota | Tremellales         | Bulleribasidiaceae   | <i>Dioszegia</i>          | 1 | 1       | - | - | - | - | - | [16]       |
| S | Basidiomycota | Tremellales         | Bulleribasidiaceae   | <i>Hannaella</i>          | 2 | 2       | - | - | - | - | - | [16]       |
| S | Basidiomycota | Tremellales         | Bulleribasidiaceae   | <i>Vishniacozyma</i>      | 6 | 3 + sp. | - | - | - | - | - | [16]       |
| S | Basidiomycota | Tremellales         | Cryptococcaceae      | <i>Kwoniella</i>          | 2 | 1 + sp. | - | - | - | - | - | [16]       |
| S | Basidiomycota | Tremellales         | Tremellaceae         | <i>Cryptococcus</i>       | 1 | sp.     | - | - | - | - | - | [12,16,17] |

|                          |                        |                     |                      |                           |                 |          |   |   |   |   |   |            |
|--------------------------|------------------------|---------------------|----------------------|---------------------------|-----------------|----------|---|---|---|---|---|------------|
| S                        | Basidiomycota          | Tremellales         | Trimorphomycetaceae  | <i>Saitozyma</i>          | 2               | 1        | - | - | - | - | - | [16]       |
| S                        | Basidiomycota          | Trichosporonales    | Trichosporonaceae    | <i>Apiotrichum</i>        | 1               | 1        | - | - | - | - | - | [16,17]    |
| S                        | Calcarisporiellomycota | Calcarisporiellales | Calcarisporiellaceae | <i>Calcarisporiella</i>   | 1               | sp.      | - | - | - | - | - | [16]       |
| S                        | Mortierellomycota      | Mortierellales      | Mortierellaceae      | <i>Mortierella</i>        | 45              | 15 + sp. | - | - | - | - | - | [12,16,17] |
| S                        | Mucoromycota           | Mucorales           | Mucoraceae           | <i>Actinomucor</i>        | 1               | 1        | - | - | - | - | - | [12,16,17] |
| S                        | Mucoromycota           | Mucorales           | Mucoraceae           | <i>Mucor</i>              | 3               | 3        | - | - | - | - | - | [12,16]    |
| S                        | Mucoromycota           | Mucorales           | Unknown              | Unknown                   | 1               | 1        | - | - | - | - | - | This study |
| S                        | Mucoromycota           | Umbelopsidales      | Umbelopsidaceae      | <i>Umbelopsis</i>         | 7               | 1 + sp.  | - | - | - | - | - | [12,16,17] |
| <b>Total saprotrophs</b> |                        |                     |                      |                           | <b>300 ASVs</b> |          |   |   |   |   |   |            |
| P                        | Ascomycota             | Botryosphaerales    | Botryosphaeriaceae   | <i>Diplodia</i>           | 1               | sp.      | - | + | - | - | - | [3,12]     |
| P                        | Ascomycota             | Botryosphaerales    | Botryosphaeriaceae   | <i>Dothiorella</i>        | 1               | 1        | - | + | - | - | - | [3,12]     |
| P                        | Ascomycota             | Botryosphaerales    | Botryosphaeriaceae   | <i>Neofusicoccum</i>      | 1               | 1        | - | + | - | - | - | [3,12]     |
| P                        | Ascomycota             | Capnodiales         | Mycosphaerellaceae   | <i>Septoria</i>           | 2               | 1        | + | - | - | - | - | [12,16]    |
| P                        | Ascomycota             | Capnodiales         | Teratosphaeriaceae   | <i>Devriesia</i>          | 2               | 1 + sp.  | + | - | - | - | - | [16,17]    |
| P                        | Ascomycota             | Chaetothyriales     | Incertae_Sedis       | <i>Neophaeococcomyces</i> | 1               | 1        | + | - | - | - | - | [16]       |
| P                        | Ascomycota             | Chaetothyriales     | Trichomeriaceae      | <i>Knufia</i>             | 3               | 1        | + | - | - | - | - | [16]       |
| P                        | Ascomycota             | Diaporthales        | Valsaceae            | <i>Phomopsis</i>          | 1               | 1        | - | + | - | - | - | [3]        |
| P                        | Ascomycota             | Glomerellales       | Plectosphaerellaceae | <i>Chordomyces</i>        | 2               | 1        | + | - | - | - | - | [17]       |
| P                        | Ascomycota             | Glomerellales       | Plectosphaerellaceae | <i>Gibellulopsis</i>      | 2               | 1 + sp.  | + | - | - | - | - | [17]       |
| P                        | Ascomycota             | Glomerellales       | Plectosphaerellaceae | <i>Plectosphaerella</i>   | 2               | 2        | + | - | - | - | - | [16,17]    |
| P                        | Ascomycota             | Helotiales          | Dermateaceae         | <i>Neofabraea</i>         | 1               | 1        | + | - | - | - | - | [16,17]    |
| P                        | Ascomycota             | Helotiales          | Dermateaceae         | <i>Trichosporiella</i>    | 1               | 1        | + | - | - | - | - | [17]       |
| P                        | Ascomycota             | Helotiales          | Helotiaceae          | <i>Pseudopezicula</i>     | 1               | 1        | + | - | - | - | - | [16,17]    |
| P                        | Ascomycota             | Helotiales          | Incertae_Sedis       | <i>Cadophora</i>          | 2               | 2        | - | + | - | - | - | [3,12]     |
| P                        | Ascomycota             | Helotiales          | Sclerotiniaceae      | <i>Botrytis</i>           | 1               | 1        | + | - | - | - | - | [16,17]    |
| P                        | Ascomycota             | Helotiales          | Sclerotiniaceae      | <i>Stromatinia</i>        | 1               | 1        | + | - | - | - | - | [16,17]    |
| P                        | Ascomycota             | Hypocreales         | Bionectriaceae       | <i>Clonostachys</i>       | 1               | 1        | + | - | - | - | - | [12,17]    |

|   |            |                  |                         |                           |    |         |   |   |   |   |   |              |
|---|------------|------------------|-------------------------|---------------------------|----|---------|---|---|---|---|---|--------------|
| P | Ascomycota | Hypocreales      | Incertae_Sedis          | <i>Acremonium</i>         | 4  | 3 + sp. | + | - | - | - | - | [12]         |
| P | Ascomycota | Hypocreales      | Incertae_Sedis          | <i>Fusariella</i>         | 1  | sp.     | + | - | - | - | - | [16]         |
| P | Ascomycota | Hypocreales      | Incertae_Sedis          | <i>Sarocladium</i>        | 2  | 2       | + | - | - | - | - | [16]         |
| P | Ascomycota | Hypocreales      | Nectriaceae             | <i>Fusarium</i>           | 8  | 7       | + | - | - | - | - | [12,16]      |
| P | Ascomycota | Hypocreales      | Nectriaceae             | Unknown                   | 1  | 1       | + | - | - | - | - | This study   |
| P | Ascomycota | Mytilinidales    | Kirschsteiniotheliaceae | <i>Taeniolella</i>        | 1  | 1       | + | - | - | - | - | [17]         |
| P | Ascomycota | Phaeomoniellales | Phaeomoniellaceae       | <i>Phaeomoniella</i>      | 29 | 1       | - | + | - | - | - | [3,12]       |
| P | Ascomycota | Pleosporales     | Didymellaceae           | <i>Boeremia</i>           | 1  | 1       | + | - | - | - | - | [12,16,17]   |
| P | Ascomycota | Pleosporales     | Didymellaceae           | <i>Chaetabolisia</i>      | 1  | 1       | + | - | - | - | - | [17]         |
| P | Ascomycota | Pleosporales     | Didymellaceae           | <i>Didymella</i>          | 11 | 3       | + | - | - | - | - | [16,17]      |
| P | Ascomycota | Pleosporales     | Didymellaceae           | <i>Neodidymelliopsis</i>  | 1  | 1       | + | - | - | - | - | [17]         |
| P | Ascomycota | Pleosporales     | Didymosphaeriaceae      | <i>Kalmusia</i>           | 2  | 1 + sp. | - | + | - | - | - | [31]         |
| P | Ascomycota | Pleosporales     | Incertae_Sedis          | <i>Foliophoma</i>         | 1  | 1       | + | - | - | - | - | [16]         |
| P | Ascomycota | Pleosporales     | Leptosphaeriaceae       | <i>Leptosphaeria</i>      | 1  | 1       | + | - | - | - | - | [16,17]      |
| P | Ascomycota | Pleosporales     | Phaeosphaeriaceae       | <i>Chaetosphaeronema</i>  | 1  | sp.     | + | - | - | - | - | [16,17]      |
| P | Ascomycota | Pleosporales     | Phaeosphaeriaceae       | <i>Paraphoma</i>          | 5  | 3       | + | - | - | - | - | [16,17]      |
| P | Ascomycota | Pleosporales     | Phaeosphaeriaceae       | <i>Populocrescentia</i>   | 1  | 1       | + | - | - | - | - | [17]         |
| P | Ascomycota | Pleosporales     | Phaeosphaeriaceae       | <i>Sclerostagonospora</i> | 1  | sp.     | - | + | - | - | - | [12,16]      |
| P | Ascomycota | Pleosporales     | Phaeosphaeriaceae       | <i>Setophaeosphaeria</i>  | 1  | 1       | + | - | - | - | - | [16,17]      |
| P | Ascomycota | Pleosporales     | Phaeosphaeriaceae       | Unknown                   | 2  | 2       | + | - | - | - | - | This study   |
| P | Ascomycota | Pleosporales     | Pleosporaceae           | <i>Alternaria</i>         | 7  | 4 + sp. | + | - | - | - | - | [12,16,17]   |
| P | Ascomycota | Pleosporales     | Pleosporaceae           | <i>Curvularia</i>         | 5  | 4 + sp. | + | - | - | - | - | [16,17]      |
| P | Ascomycota | Pleosporales     | Pleosporaceae           | <i>Stemphylium</i>        | 1  | 1       | + | - | - | - | - | [16,17]      |
| P | Ascomycota | Pleosporales     | Unknown                 | Unknown                   | 1  | 1       | + | - | - | - | - | This study   |
| P | Ascomycota | Togniniales      | Togniniaceae            | <i>Phaeoacremonium</i>    | 8  | 2       | - | + | - | - | - | [3,12,16,17] |
| P | Ascomycota | Venturiales      | Venturiaceae            | <i>Tyrannosorus</i>       | 1  | 1       | + | - | - | - | - | [17]         |
| P | Ascomycota | Venturiales      | Venturiaceae            | <i>Venturia</i>           | 1  | sp.     | + | - | - | - | - | [16,17]      |
| P | Ascomycota | Xylariales       | Amphisphaeriaceae       | <i>Seimatosporium</i>     | 2  | 1       | - | + | - | - | - | [12,16]      |



|                                |               |                     |                  |                     |                 |         |   |   |   |   |   |              |
|--------------------------------|---------------|---------------------|------------------|---------------------|-----------------|---------|---|---|---|---|---|--------------|
| P                              | Ascomycota    | Xylariales          | Bartaliniaceae   | <i>Truncatella</i>  | 1               | 1       | - | + | - | - | - | [12,16,17]   |
| P                              | Ascomycota    | Xylariales          | Diatrypaceae     | <i>Cryptovalsa</i>  | 1               | 1       | - | + | - | - | - | [3,12,16,17] |
| P                              | Ascomycota    | Xylariales          | Diatrypaceae     | <i>Eutypa</i>       | 1               | 1       | - | + | - | - | - | [3,12,16,17] |
| P                              | Ascomycota    | Xylariales          | Microdochiaceae  | <i>Microdochium</i> | 4               | 2 + sp. | + | - | - | - | - | [16]         |
| P                              | Basidiomycota | Agaricales          | Incertae_Sedis   | <i>Uncobasidium</i> | 1               | sp.     | + | - | + | - | - | [16]         |
| P                              | Basidiomycota | Agaricales          | Omphalotaceae    | <i>Gymnopus</i>     | 4               | 2       | + | - | + | - | - | [17]         |
| P                              | Basidiomycota | Agaricales          | Tricholomataceae | <i>Mycena</i>       | 4               | 1 + sp. | + | - | - | - | - | [17]         |
| P                              | Basidiomycota | Cystofilobasidiales | Mrakiaceae       | <i>Itersonilia</i>  | 1               | 1       | + | - | - | - | - | [16,17]      |
| P                              | Basidiomycota | Hymenochaetales     | Hymenochaetaceae | <i>Fomitiporia</i>  | 16              | 1 + sp. | - | + | + | - | - | [3,12,16,17] |
| P                              | Basidiomycota | Hymenochaetales     | Hymenochaetaceae | <i>Phellinus</i>    | 8               | 2       | - | + | + | - | - | [12,16,17]   |
| P                              | Basidiomycota | Hymenochaetales     | Hymenochaetaceae | Unknown             | 53              | -       | - | + | + | - | - | [8]          |
| P                              | Basidiomycota | Incertae_Sedis      | Incertae_Sedis   | <i>Xenasmatella</i> | 1               | 1       | + | - | + | - | - | [16,17]      |
| P                              | Basidiomycota | Polyporales         | Ganodermataceae  | <i>Ganoderma</i>    | 1               | 1       | + | - | + | - | - | [16,17]      |
| P                              | Basidiomycota | Russulales          | Peniophoraceae   | <i>Peniophora</i>   | 2               | 2       | + | - | + | - | - | [16,17]      |
| P                              | Opidiomycota  | Olpidiales          | Olpidiaceae      | <i>Olpidium</i>     | 1               | 2       | + | - | - | - | - | [17]         |
| <b>Total pathotrophs</b>       |               |                     |                  |                     | <b>226 ASVs</b> |         |   |   |   |   |   |              |
| <b>Total plant-pathogens</b>   |               |                     |                  |                     | <b>98 ASVs</b>  |         |   |   |   |   |   |              |
| <b>Total GTD-pathotrophs</b>   |               |                     |                  |                     | <b>128 ASVs</b> |         |   |   |   |   |   |              |
| <b>Total causing white rot</b> |               |                     |                  |                     | <b>86 ASVs</b>  |         |   |   |   |   |   |              |
| Sy                             | Ascomycota    | Helotiales          | Incertae_Sedis   | <i>Leohumicola</i>  | 2               | 1 + sp. | - | - | - | - | + | [16,17]      |
| Sy                             | Ascomycota    | Helotiales          | Myxotrichaceae   | <i>Oidiodendron</i> | 8               | 5       | - | - | - | - | + | [17]         |
| Sy                             | Ascomycota    | Mytilinidales       | Gloniaceae       | <i>Cenococcum</i>   | 3               | 1 + sp. | - | - | - | + | - | [16,17]      |
| Sy                             | Ascomycota    | Pezizales           | Pezizaceae       | <i>Terfezia</i>     | 1               | 1       | - | - | - | + | - | [16,17]      |
| Sy                             | Basidiomycota | Agaricales          | Cortinariaceae   | <i>Cortinarius</i>  | 7               | 4 + sp. | - | - | - | + | - | [16,17]      |
| Sy                             | Basidiomycota | Agaricales          | Hygrophoraceae   | <i>Hygrophorus</i>  | 1               | 1       | - | - | - | + | - | [16,17]      |
| Sy                             | Basidiomycota | Agaricales          | Hymenogastraceae | <i>Hymenogaster</i> | 1               | 1       | - | - | - | + | - | [16,17]      |
| Sy                             | Basidiomycota | Agaricales          | Inocybaceae      | <i>Inocybe</i>      | 2               | 1 + sp. | - | - | - | + | - | [16,17]      |
| Sy                             | Basidiomycota | Agaricales          | Tricholomataceae | <i>Mycenella</i>    | 1               | 1       | - | - | - | + | - | [17]         |

|                      |               |                |                       |                         |         |         |   |   |   |   |   |          |
|----------------------|---------------|----------------|-----------------------|-------------------------|---------|---------|---|---|---|---|---|----------|
| Sy                   | Basidiomycota | Agaricales     | Tricholomataceae      | <i>Tricholoma</i>       | 1       | 1       | - | - | - | + | - | [16,17]  |
| Sy                   | Basidiomycota | Atheliales     | Atheliaceae           | <i>Amphinema</i>        | 2       | 1       | - | - | - | + | - | [16,17]  |
| Sy                   | Basidiomycota | Atheliales     | Atheliaceae           | <i>Piloderma</i>        | 1       | sp.     | - | - | - | + | - | [16,17]  |
| Sy                   | Basidiomycota | Boletales      | Boletaceae            | <i>Leccinellum</i>      | 2       | 1       | - | - | - | + | - | [16,17]  |
| Sy                   | Basidiomycota | Boletales      | Melanogastraceae      | <i>Melanogaster</i>     | 1       | 1       | - | - | - | + | - | [16]     |
| Sy                   | Basidiomycota | Cantharellales | Clavulinaceae         | <i>Clavulina</i>        | 8       | sp.     | - | - | - | + | - | [16,17]  |
| Sy                   | Basidiomycota | Cantharellales | Hydnaceae             | <i>Hydnum</i>           | 2       | 1 + sp. | - | - | - | + | - | [16,17]  |
| Sy                   | Basidiomycota | Russulales     | Russulaceae           | <i>Lactarius</i>        | 2       | 2       | - | - | - | + | - | [16,17]  |
| Sy                   | Basidiomycota | Russulales     | Russulaceae           | <i>Russula</i>          | 12      | 8 + sp. | - | - | - | + | - | [17]     |
| Sy                   | Basidiomycota | Sebacinales    | Sebacinaceae          | <i>Sebacina</i>         | 2       | sp.     | - | - | - | + | - | [16,17]  |
| Sy                   | Basidiomycota | Thelephorales  | Bankeraceae           | <i>Hydnellum</i>        | 1       | 1       | - | - | - | + | - | [16,17]  |
| Sy                   | Basidiomycota | Thelephorales  | Thelephoraceae        | <i>Pseudotomentella</i> | 1       | 1       | - | - | - | + | - | [16,17]  |
| Sy                   | Basidiomycota | Thelephorales  | Thelephoraceae        | <i>Thelephora</i>       | 3       | 2 + sp. | - | - | - | + | - | [16,17]  |
| Sy                   | Basidiomycota | Thelephorales  | Thelephoraceae        | <i>Tomentella</i>       | 2       | 2       | - | - | - | + | - | [16,17]  |
| Total symbiotrophs   |               |                |                       |                         | 66 ASVs |         |   |   |   |   |   |          |
|                      | Ascomycota    | Dothideales    | Aureobasidiaceae      | <i>Aureobasidium</i>    | 21      | 1 + sp. | - | - | - | - | - | [2,9,30] |
| BCA                  | Ascomycota    | Hypocreales    | Clavicipitaceae       | <i>Keithomyces</i>      | 1       | 1       | - | - | - | - | - | [17]     |
| BCA                  | Ascomycota    | Hypocreales    | Clavicipitaceae       | <i>Metapochonia</i>     | 1       | 1       | - | - | - | - | - | [17]     |
| BCA                  | Ascomycota    | Hypocreales    | Hypocreaceae          | <i>Trichoderma</i>      | 3       | 3       | - | - | - | - | - | [9,16]   |
| BCA                  | Ascomycota    | Hypocreales    | Nectriaceae           | <i>Fusicolla</i>        | 1       | 1       | - | - | - | - | - | [16]     |
| BCA                  | Basidiomycota | Tremellales    | Rhynchogastremataceae | <i>Papiliotrema</i>     | 2       | 2       | - | - | - | - | - | [16]     |
| BCA                  | Basidiomycota | Tremellales    | Tremellaceae          | <i>Tremella</i>         | 1       | sp.     | - | - | - | - | - | [16]     |
| Total potencial BCAs |               |                |                       |                         | 30 ASVs |         |   |   |   |   |   |          |
